# Supplementary material for: Reduced adhesion of aged intestinal stem cells contributes to an accelerated clonal drift
Source: Life Sci Alliance. 2022 Apr 29;5(8):e202201408. doi: 10.26508/lsa.202201408 (PMC9057243; doi:10.26508/lsa.202201408)
Supplement: Supplementary file 5 [file LSA-2022-01408_TableS1.xlsx]

## Sheet: Sheet1
Ensembl gene id	Gene name	Corr. Coef.
ENSMUSG00000022587	Ly6e	0.471072
ENSMUSG00000039774	Galnt12	0.434963
ENSMUSG00000048078	Tenm4	0.410457
ENSMUSG00000040412	5330417C22Rik	0.396181
ENSMUSG00000031919	Tmed6	0.379862
ENSMUSG00000025085	Ablim1	0.379761
ENSMUSG00000087150	BC064078	0.37211
ENSMUSG00000021749	Oit1	0.369505
ENSMUSG00000092210	A930009A15Rik	0.368385
ENSMUSG00000026674	Ddr2	0.367277
ENSMUSG00000023057	Fabp2	0.35816
ENSMUSG00000044860	Gm1123	0.35747
ENSMUSG00000033066	Gas7	0.3551
ENSMUSG00000063428	Ddo	0.352922
ENSMUSG00000000805	Car4	0.346904
ENSMUSG00000063903	Klk1	0.34155
ENSMUSG00000048992	Prss32	0.338962
ENSMUSG00000047517	Dmbt1	0.327786
ENSMUSG00000040181	Fmo1	0.322736
ENSMUSG00000024747	Aldh1a7	0.321593
ENSMUSG00000023031	Cela1	0.318944
ENSMUSG00000031604	Msmo1	0.311261
ENSMUSG00000024538	Ppic	0.308668
ENSMUSG00000086641	Gm13663	0.308427
ENSMUSG00000033427	Upb1	0.306417
ENSMUSG00000044986	Tst	0.304885
ENSMUSG00000063229	Ldha	0.304541
ENSMUSG00000019762	Iyd	0.298842
ENSMUSG00000005360	Slc1a3	0.298437
ENSMUSG00000025479	Cyp2e1	0.292464
ENSMUSG00000040147	Maob	0.292078
ENSMUSG00000025993	Slc40a1	0.291061
ENSMUSG00000006360	Crip1	0.289542
ENSMUSG00000067231	Cyp2c65	0.288885
ENSMUSG00000063929	Cyp4a32	0.288691
ENSMUSG00000021213	Akr1c13	0.288625
ENSMUSG00000031886	Ces2e	0.286781
ENSMUSG00000001467	Cyp51	0.284421
ENSMUSG00000018796	Acsl1	0.279173
ENSMUSG00000028943	Espn	0.271059
ENSMUSG00000072620	Slfn2	0.269734
ENSMUSG00000054422	Fabp1	0.265104
ENSMUSG00000032578	Cish	0.263452
ENSMUSG00000028150	Rorc	0.259905
ENSMUSG00000030298	Sec13	0.258064
ENSMUSG00000074882	Cyp2c68	0.254607
ENSMUSG00000025130	P4hb	0.249479
ENSMUSG00000046804	Phgr1	0.24923
ENSMUSG00000056749	Nfil3	0.24837
ENSMUSG00000020277	Pfkl	0.248026
ENSMUSG00000032978	Guca2b	0.247862
ENSMUSG00000053279	Aldh1a1	0.247857
ENSMUSG00000046598	Bdh1	0.24783
ENSMUSG00000034926	Dhcr24	0.243787
ENSMUSG00000093930	Hmgcs1	0.243071
ENSMUSG00000024935	Slc1a1	0.242722
ENSMUSG00000029161	Cgref1	0.24215
ENSMUSG00000066150	Slc31a1	0.241183
ENSMUSG00000020873	Slc35b1	0.241079
ENSMUSG00000042367	Gjb3	0.235149
ENSMUSG00000063354	Slc39a4	0.234467
ENSMUSG00000020571	Pdia6	0.234304
ENSMUSG00000026687	Aldh9a1	0.233475
ENSMUSG00000055114	Anxa13	0.233272
ENSMUSG00000020614	Fam20a	0.231543
ENSMUSG00000026784	Pdss1	0.23097
ENSMUSG00000043705	Capn13	0.230433
ENSMUSG00000029802	Abcg2	0.229878
ENSMUSG00000018042	Cyb5r3	0.228845
ENSMUSG00000027790	Sis	0.228615
ENSMUSG00000029700	Slc13a1	0.228357
ENSMUSG00000025466	Fuom	0.227309
ENSMUSG00000115902	1	0.223438
ENSMUSG00000025986	Slc39a10	0.223323
ENSMUSG00000028671	Gale	0.222661
ENSMUSG00000026380	Tfcp2l1	0.220801
ENSMUSG00000024712	Rfk	0.220643
ENSMUSG00000031877	Ces2g	0.220341
ENSMUSG00000032083	Apoa1	0.220196
ENSMUSG00000032193	Ldlr	0.217656
ENSMUSG00000022351	Sqle	0.216675
ENSMUSG00000056671	Prelid2	0.214881
ENSMUSG00000027808	Serp1	0.213807
ENSMUSG00000064202	4430402I18Rik	0.213127
ENSMUSG00000047496	Rnf152	0.212855
ENSMUSG00000025467	Prap1	0.211949
ENSMUSG00000032080	Apoa4	0.210208
ENSMUSG00000027463	Slc52a3	0.210178
ENSMUSG00000052396	Mogat2	0.209827
ENSMUSG00000021453	Gadd45g	0.20959
ENSMUSG00000022048	Dpysl2	0.208965
ENSMUSG00000068417	Pnp2	0.208901
ENSMUSG00000023067	Cdkn1a	0.208314
ENSMUSG00000023262	Acy1	0.207653
ENSMUSG00000022844	Pdia5	0.207101
ENSMUSG00000021798	Ldb3	0.205087
ENSMUSG00000029811	Aoc1	0.204874
ENSMUSG00000047797	Gjb1	0.204626
ENSMUSG00000037916	Ndufv1	0.204364
ENSMUSG00000003279	Dlgap1	0.204353
ENSMUSG00000023232	Serinc2	0.204333
ENSMUSG00000002658	Gtf2f1	0.203337
ENSMUSG00000034457	Eda2r	0.203064
ENSMUSG00000005299	Letm1	0.203063
ENSMUSG00000086712	AI427809	0.202818
ENSMUSG00000004266	Ptpn6	0.202758
ENSMUSG00000095026	Gm3336	0.202323
ENSMUSG00000033105	Lss	0.201263
ENSMUSG00000015806	Qdpr	0.200621
ENSMUSG00000069456	Rdh16	0.20001
ENSMUSG00000026864	Hspa5	0.199874
ENSMUSG00000071551	Akr1c19	0.197793
ENSMUSG00000074373	Gm10680	0.19698
ENSMUSG00000021211	Akr1c12	0.196769
ENSMUSG00000054733	Msra	0.196548
ENSMUSG00000019139	Isyna1	0.196228
ENSMUSG00000035780	Ugt2a3	0.196088
ENSMUSG00000025492	Ifitm3	0.195937
ENSMUSG00000018919	Tm4sf5	0.195933
ENSMUSG00000029482	Aacs	0.195471
ENSMUSG00000025037	Maoa	0.194196
ENSMUSG00000023247	Guca2a	0.194067
ENSMUSG00000010663	Fads1	0.194017
ENSMUSG00000054999	Naaladl1	0.193384
ENSMUSG00000027642	Rpn2	0.192581
ENSMUSG00000029102	Hgfac	0.192247
ENSMUSG00000022210	Dhrs4	0.192115
ENSMUSG00000027761	Aadac	0.19202
ENSMUSG00000041939	Mvk	0.191882
ENSMUSG00000032278	Paqr5	0.191551
ENSMUSG00000035232	Pdk3	0.191359
ENSMUSG00000023909	Paqr4	0.191286
ENSMUSG00000048572	Tmem252	0.190781
ENSMUSG00000057315	Arhgap24	0.190745
ENSMUSG00000066839	Ecsit	0.190464
ENSMUSG00000041736	Tspo	0.189971
ENSMUSG00000020405	Fabp6	0.189949
ENSMUSG00000029759	Pon3	0.189386
ENSMUSG00000062410	Hsd3b3	0.188463
ENSMUSG00000010047	Hyal2	-0.101133
ENSMUSG00000028028	Alpk1	-0.101729
ENSMUSG00000036053	Fmnl2	-0.102116
ENSMUSG00000024900	Cpt1a	-0.102747
ENSMUSG00000026639	Lamb3	-0.103727
ENSMUSG00000058656	Samd12	-0.104434
ENSMUSG00000039607	Rbms3	-0.104858
ENSMUSG00000022358	Fbxo32	-0.104981
ENSMUSG00000040433	Zbtb38	-0.10504
ENSMUSG00000033538	Casp4	-0.105837
ENSMUSG00000005883	Spo11	-0.107288
ENSMUSG00000075010	AW112010	-0.107299
ENSMUSG00000032596	Uba7	-0.107801
ENSMUSG00000073421	Ab1	-0.108901
ENSMUSG00000034427	Myo15b	-0.109374
ENSMUSG00000030623	Prss23os	-0.110336
ENSMUSG00000040717	Il17rd	-0.110953
ENSMUSG00000022504	Ciita	-0.111712
ENSMUSG00000041642	Kif21b	-0.112283
ENSMUSG00000027684	Mecom	-0.112789
ENSMUSG00000053647	Gper1	-0.112911
ENSMUSG00000054200	Ffar4	-0.113581
ENSMUSG00000072653	Zfp783	-0.114074
ENSMUSG00000000409	Lck	-0.114403
ENSMUSG00000106570	C230071H17Rik	-0.11447
ENSMUSG00000030621	Me3	-0.114994
ENSMUSG00000026322	Htr4	-0.115926
ENSMUSG00000039304	Tnfsf10	-0.117013
ENSMUSG00000020282	Rhbdf1	-0.118339
ENSMUSG00000029247	Paics	-0.118547
ENSMUSG00000057982	Zfp809	-0.119085
ENSMUSG00000048905	4930539E08Rik	-0.119819
ENSMUSG00000022231	Sema5a	-0.11998
ENSMUSG00000028494	Plin2	-0.121709
ENSMUSG00000044716	Dok7	-0.122177
ENSMUSG00000002265	Peg3	-0.122678
ENSMUSG00000040557	Mettl27	-0.12269
ENSMUSG00000031808	Slc27a1	-0.123532
ENSMUSG00000022464	Slc38a4	-0.123741
ENSMUSG00000021097	Clmn	-0.124513
ENSMUSG00000024114	Prss41	-0.124756
ENSMUSG00000020826	Nos2	-0.125177
ENSMUSG00000031633	Slc25a4	-0.12555
ENSMUSG00000075520	Malrd1	-0.125633
ENSMUSG00000053414	Hunk	-0.12625
ENSMUSG00000006445	Epha2	-0.127084
ENSMUSG00000037386	Rims2	-0.128858
ENSMUSG00000050071	Bex1	-0.128867
ENSMUSG00000036264	Fstl4	-0.129464
ENSMUSG00000042284	Itga1	-0.129782
ENSMUSG00000033767	Tmem131l	-0.129843
ENSMUSG00000024187	Fam234a	-0.130127
ENSMUSG00000021587	Pcsk1	-0.130635
ENSMUSG00000001270	Ckb	-0.130641
ENSMUSG00000029249	Rest	-0.131875
ENSMUSG00000031762	Mt2	-0.132431
ENSMUSG00000031617	Tmem184c	-0.132595
ENSMUSG00000024254	Abcg8	-0.134006
ENSMUSG00000003352	Cacnb3	-0.136466
ENSMUSG00000021336	Slc17a4	-0.138044
ENSMUSG00000038301	Snx10	-0.138765
ENSMUSG00000017493	Igfbp4	-0.140164
ENSMUSG00000015243	Abca1	-0.140716
ENSMUSG00000029167	Ppargc1a	-0.140795
ENSMUSG00000027799	Nbea	-0.14223
ENSMUSG00000069874	Irgm2	-0.143264
ENSMUSG00000025887	Casp12	-0.144391
ENSMUSG00000026494	Kif26b	-0.144483
ENSMUSG00000025165	Sectm1a	-0.146639
ENSMUSG00000015647	Lama5	-0.147546
ENSMUSG00000102802	ps	-0.147903
ENSMUSG00000030711	Sult1a1	-0.148047
ENSMUSG00000033149	Phldb2	-0.149808
ENSMUSG00000074151	Nlrc5	-0.151033
ENSMUSG00000036231	Agr3	-0.151109
ENSMUSG00000047945	Marcksl1	-0.151962
ENSMUSG00000003518	Dusp3	-0.152034
ENSMUSG00000001943	Vsig2	-0.153114
ENSMUSG00000003526	Prodh	-0.153362
ENSMUSG00000051579	Tceal8	-0.153423
ENSMUSG00000034612	Chst11	-0.154811
ENSMUSG00000003282	Plag1	-0.158172
ENSMUSG00000005087	Cd44	-0.159608
ENSMUSG00000022389	Tef	-0.163396
ENSMUSG00000037820	Tgm2	-0.164568
ENSMUSG00000019737	Syne4	-0.166682
ENSMUSG00000111271	Gm48127	-0.16756
ENSMUSG00000009418	Nav1	-0.170995
ENSMUSG00000022037	Clu	-0.171302
ENSMUSG00000024070	Prkd3	-0.172102
ENSMUSG00000018899	Irf1	-0.172825
ENSMUSG00000025854	Fam20c	-0.175644
ENSMUSG00000052212	Cd177	-0.178823
ENSMUSG00000020674	Pxdn	-0.181665
ENSMUSG00000028357	Kif12	-0.182105
ENSMUSG00000034485	Uaca	-0.182775
ENSMUSG00000022129	Dct	-0.185311
ENSMUSG00000019843	Fyn	-0.186555
ENSMUSG00000078921	Tgtp2	-0.187587
ENSMUSG00000041112	Elmo1	-0.188554
ENSMUSG00000028780	Sema3c	-0.194434
ENSMUSG00000021477	Ctsl	-0.201424
ENSMUSG00000022562	Oplah	-0.202793
ENSMUSG00000028399	Ptprd	-0.205363
ENSMUSG00000109936	Gm45889	-0.208245
ENSMUSG00000028184	Adgrl2	-0.213365
ENSMUSG00000044461	Shisa2	-0.214433
ENSMUSG00000038732	Mboat1	-0.214656
ENSMUSG00000024597	Slc12a2	-0.218011
ENSMUSG00000042834	Nrep	-0.219139
ENSMUSG00000042429	Adora1	-0.223193
ENSMUSG00000026970	Rbms1	-0.229228
ENSMUSG00000020140	Lgr5	-0.231761
ENSMUSG00000021775	Nr1d2	-0.234156
ENSMUSG00000031451	Gas6	-0.237044
ENSMUSG00000047501	Cldn4	-0.238926
ENSMUSG00000031626	Sorbs2	-0.238947
ENSMUSG00000040505	Abcg5	-0.240127
ENSMUSG00000013076	Amotl1	-0.241111
ENSMUSG00000026600	Soat1	-0.244543
ENSMUSG00000066687	Zbtb16	-0.24827
ENSMUSG00000039364	Sectm1b	-0.249584
ENSMUSG00000028327	Stra6l	-0.254078
ENSMUSG00000039585	Myo9a	-0.259871
ENSMUSG00000059336	Slc14a1	-0.261684
ENSMUSG00000084939	Gm830	-0.26377
ENSMUSG00000027359	Slc27a2	-0.264293
ENSMUSG00000025017	Pik3ap1	-0.285734
ENSMUSG00000023348	Trip6	-0.293857
ENSMUSG00000101609	Kcnq1ot1	-0.296272
ENSMUSG00000060548	Tnfrsf19	-0.299235
ENSMUSG00000025856	Pdgfa	-0.305329
ENSMUSG00000022043	Trim35	-0.312331
ENSMUSG00000020889	Nr1d1	-0.323823
ENSMUSG00000022508	Bcl6	-0.34217
ENSMUSG00000037145	2210407C18Rik	-0.43413
ENSMUSG00000027219	Slc28a2	-0.473133
ENSMUSG00000020183	Cpm	-0.475698
ENSMUSG00000063171	Rps4l	-0.628947
Table S1. Differentially expressed genes young versusvs. aged intestinal stem cellISCs. 5% of positively (higher aging likelihood predictors) or negatively correlated (higher young likelihood predictors) genes comparing young and aged intestinal stem cellISC.
